# Supplementary material for: Metal-ion-triggered symmetry breaking of completely achiral azobenzene amphiphiles in water
Source: Royal Society of Chemistry journal article supplement (doi:10.1039/d3nr06668a), 2024-01-01
Supplement: d3nr06668a1.pdf [file d3nr06668a1.pdf]

## Supporting Information

# Metal-ion-triggered symmetry breaking of completely achiral azobenzene amphiphile in water

Yun-Han Yang, Ran He, Yang Qin, and Ling Zhang\*

*PCFM Lab, IGCME, School of Chemistry, Sun Yat-Sen University, Guangzhou, 510275, China*

E-mail: [ceszl@mail.sysu.edu.cn](mailto:ceszl@mail.sysu.edu.cn)

## Table of Contents

|                                                                                                                                                                                                                                                                                                                                  |     |
|----------------------------------------------------------------------------------------------------------------------------------------------------------------------------------------------------------------------------------------------------------------------------------------------------------------------------------|-----|
| 1. Materials. ....                                                                                                                                                                                                                                                                                                               | S1  |
| 2. Instruments and Measurements. ....                                                                                                                                                                                                                                                                                            | S1  |
| 3. Synthesis. ....                                                                                                                                                                                                                                                                                                               | S2  |
| Scheme S1. Synthetic routes of EDCAz1, EDCAz2, and EDCCNA. ....                                                                                                                                                                                                                                                                  | S2  |
| 4. Self-assembly Experiments. ....                                                                                                                                                                                                                                                                                               | S3  |
| 5. Evaluation of LD Contribution. ....                                                                                                                                                                                                                                                                                           | S3  |
| 6. Job's plot. ....                                                                                                                                                                                                                                                                                                              | S4  |
| 7. Computational Details. ....                                                                                                                                                                                                                                                                                                   | S4  |
| Fig. S1 TEM images of cationic EDCAz1/Fe <sup>3+</sup> system; shuttle-like nanosheets (a, b) and nanotubes (c, d); inset in (b, d) is the fast Fourier transformation (FFT) pattern. ....                                                                                                                                       | S5  |
| Fig. S2 TEM images of cationic EDCAz1/Al <sup>3+</sup> (a), cationic EDCAz1/Cu <sup>2+</sup> (b), and cationic EDCAz1/Ca <sup>2+</sup> (c). ....                                                                                                                                                                                 | S5  |
| Fig. S3 Absorption spectra of PdCl <sub>2</sub> in dilute hydrochloric acid aqueous solution. ....                                                                                                                                                                                                                               | S6  |
| Fig. S4 CD spectra of cationic EDCAz1. ....                                                                                                                                                                                                                                                                                      | S6  |
| Fig. S5 CD spectra of cationic EDCAz1/Al <sup>3+</sup> (a, b, and c), cationic EDCAz1/Cu <sup>2+</sup> (d, e, and f), cationic EDCAz1/Ca <sup>2+</sup> (g, h, and i), and cationic EDCAz1/Pd <sup>2+</sup> (j). ....                                                                                                             | S7  |
| Fig. S6 The contribution of LD to ECD is assessed as represented by cationic EDCAz1/Fe <sup>3+</sup> and cationic SEDCAz1/Zn <sup>2+</sup> systems. ....                                                                                                                                                                         | S8  |
| Fig. S7 ECD changes in samples represented by cationic EDCAz1/Fe <sup>3+</sup> under UV (a) and heating-cooling stimuli (b). ....                                                                                                                                                                                                | S8  |
| Fig. S8 TEM images of cationic EDCAz2 (a), cationic EDCAz2/Zn <sup>2+</sup> (b), cationic EDCAz2/Fe <sup>2+</sup> (c); Scale bars, 200 nm. ....                                                                                                                                                                                  | S8  |
| Fig. S9 CD spectra of cationic EDCAz2, cationic EDCAz2/Fe <sup>2+</sup> , and cationic EDCAz2/Zn <sup>2+</sup> (a); CD spectra of cationic EDCCNA, cationic EDCCNA/Fe <sup>2+</sup> , and cationic EDCCNA/Zn <sup>2+</sup> (a). ....                                                                                             | S9  |
| Fig. S10 <sup>1</sup> H NMR spectra of EDCAz1 in DMSO- <i>d</i> <sub>6</sub> with the addition of different equiv. of Zn <sup>2+</sup> . (EDCAz1 was dissolved in DMSO- <i>d</i> <sub>6</sub> followed by the sequential addition of Zn(NO <sub>3</sub> ) <sub>2</sub> ·6H <sub>2</sub> O in DMSO- <i>d</i> <sub>6</sub> .) .... | S9  |
| Fig. S11 Comparison of experimental infrared absorption spectroscopy with computed vibrational circular dichroism. ....                                                                                                                                                                                                          | S10 |
| 8. <sup>1</sup> H NMR and <sup>13</sup> C NMR Spectra. ....                                                                                                                                                                                                                                                                      | S11 |
| References. ....                                                                                                                                                                                                                                                                                                                 | S14 |

1 **1. Materials.**

2 All commercial reagents were purchased from Energy Chemical, Acmechem or Tansoole and were used as received. Unless otherwise  
3 noted, all starting materials and reagents were used without further purification. All aqueous solutions were prepared with deionized  
4 distilled water obtained from a Milli-Q water-purifying system (18 M $\Omega$  cm).

5

6 **2. Instruments and Measurements.**

7 The <sup>1</sup>H NMR spectra were recorded at 298 K on Bruker AVANCE III 400 MHz spectrometer using the residual solvent proton  
8 signal for calibration. Mass spectra (MS) were recorded on a thermo fisher scientific's Q exactive UHMR hybrid quadrupole-orbitrap  
9 mass spectrometer LC/MS (ESI). AFM imaging of samples prepared by dropping on a freshly cleaved mica were obtained on the  
10 Dimension FastScan Bio AFM. Circular dichroism (CD) spectra were recorded on a JASCO J1700 circular dichroism spectrometer  
11 in 1 mm path length quartz cuvette. AFM imaging of samples prepared by dropping on a freshly cleaved mica were obtained on the  
12 Dimension FastScan Bio AFM. The SEM images were recorded on a ZEISS Gemini 500 high-resolution thermal field emission  
13 scanning electron microscopy. The TEM instrument used was a JEOL JEM-2010 equipped with a Gatan 832 CCD camera. The  
14 samples of TEM and SEM were prepared at room temperature by placing a droplet on a formvar stabilized with carbon support film,  
15 and then the support film was blotted to remove the excess solution with filter paper. The FT-IR spectra were recorded using a  
16 PerkinElmer Frontier spectrophotometer, and the data was collected using an attenuated total reflection (ATR) unit. Weighing was  
17 performed on a Mettler EL204 analytical electronic balance.

18 3. Synthesis.

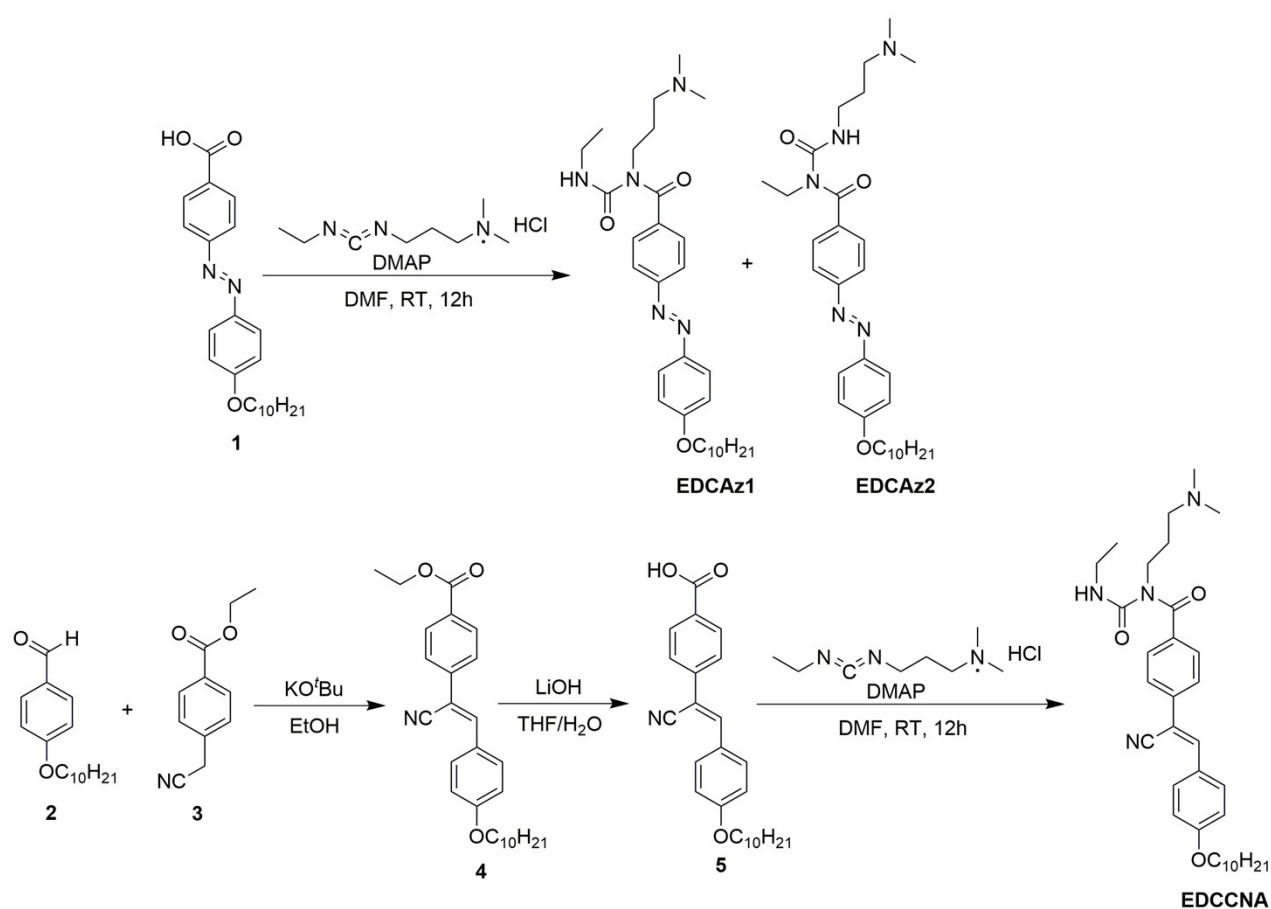

19  
20 **Scheme S1.** Synthetic routes of EDCAz1, EDCAz2, and EDCCNA.  
21

22 **EDCAz1** was synthesized according to our previous report.<sup>[S1]</sup>

23 **EDCAz2** was obtained as an isomer of **EDCAz1** by isolation (DCM/MeOH/TEA = 40:1:0.02, v/v/v, yield 20 %). **<sup>1</sup>H NMR (600**  
 24 **MHz, CDCl<sub>3</sub>):**  $\delta$  9.04 (t,  $J$  = 5.5, 1H), 7.92 (d,  $J$  = 8.6, 4H), 7.56 (d,  $J$  = 8.3, 2H), 7.01 (d,  $J$  = 9.0, 2H), 4.05 (t,  $J$  = 6.6, 2H), 3.80 –  
 25 3.75 (m, 2H), 3.40 (q,  $J$  = 6.4, 2H), 2.40 (dd,  $J$  = 8.2, 6.2, 2H), 2.26 (s, 6H), 1.82 (t,  $J$  = 7.4, 2H), 1.79 – 1.74 (m, 2H), 1.47 (t,  $J$  = 7.7,  
 26 2H), 1.34 – 1.25 (m, 12H), 1.13 (t,  $J$  = 7.0, 3H), 0.89 (d,  $J$  = 6.8, 3H). **<sup>13</sup>C NMR (151 MHz, CDCl<sub>3</sub>):**  $\delta$  = 174.10, 162.43, 154.77,  
 27 153.67, 146.89, 137.88, 127.04, 125.25, 122.87, 114.95, 68.59, 57.54, 45.45, 44.84, 42.15, 39.26, 32.02, 29.69, 29.68, 29.50, 29.44,  
 28 29.30, 27.11, 26.13, 22.81, 15.14, 14.24. **HRMS (ESI):**  $m/z$  calculated for  $[M+H]^+$  C<sub>31</sub>H<sub>48</sub>N<sub>5</sub>O<sub>3</sub><sup>+</sup>, 538.37517, found 538.37402.

29 The **compound 2** was synthesized according to literature procedure.<sup>[S2]</sup>

30 **Synthesis of compound 5:** The compound **2** (0.9 g, 3.44 mmol) and compound **3** (0.6 g, 3.44 mmol) were dissolved in anhydrous  
 31 ethanol (50 mL), then anhydrous potassium tert-butoxide (0.3 g, 3.44 mmol) was added to the solution. After stirred overnight, white  
 32 precipitate was obtained from the solution. After filtration, white powder (compound **4**) was obtained. This crude product was

33 dissolved in mixed solution (THF/H<sub>2</sub>O = 3:1, v/v, 60.00 mL), LiOH (0.15 g, 6 mmol) was added, and then stirred at room temperature  
34 for 6 hours. A white solid suspension was obtained by adding hydrochloric acid to adjust pH to 2.0. The obtained white solid was  
35 filtered and dried under vacuum to give the crude product. Recrystallization in methanol afforded the white pure product compound  
36 **5**. **<sup>1</sup>H NMR (400 MHz, DMSO-*d*<sub>6</sub>)**: δ 13.14 (s, 1H), 8.11 (s, 1H), 8.03 (d, *J* = 8.6, 2H), 7.98 (d, *J* = 9.0, 2H), 7.86 (d, *J* = 8.5, 2H),  
37 7.11 (d, *J* = 8.9, 2H), 4.06 (t, *J* = 6.5, 2H), 1.69 – 1.76 (m, 2H), 1.38 – 1.44 (m, 2H), 1.36 – 1.18 (m, 14H), 0.87 – 0.83 (m, 3H). **<sup>13</sup>C**  
38 **NMR (100 MHz, DMSO-*d*<sub>6</sub>)**: δ = 166.78, 161.07, 144.36, 138.30, 131.59, 130.61, 130.10, 125.86, 125.57, 118.19, 115.04, 105.84,  
39 67.85, 31.33, 29.03, 28.98, 28.76, 28.73, 28.55, 25.47, 22.13, 14.00. **HRMS (ESI)**: *m/z* calculated for [M-H]<sup>-</sup> C<sub>26</sub>H<sub>30</sub>NO<sub>3</sub><sup>-</sup>, 404.22312,  
40 found 404.22388.

41 **Synthesis of EDCCNA**: The compound **5** (0.389 g, 1 mmol), EDCI (0.38g, 2 mmol) and DMAP (0.061g, 0.5 mmol) were dissolved  
42 in DMF (20 mL) at room temperature. The reaction was allowed to continue stirring for 12 hours. The crude product was diluted with  
43 water (30 mL) and then extracted with EDCI (3 × 15 mL) and washed with saturated aqueous NaCl (3 × 50 mL). The organic phase  
44 was dried over MgSO<sub>4</sub> and concentrated in vacuo by rotary evaporation. Purification via column chromatography (DCM: MeOH:  
45 TEA=50:1:0.25) to obtain **EDCCNA** as a white solid (0.35 g, 50%). **<sup>1</sup>H NMR (400 MHz, DMSO-*d*<sub>6</sub>)**: δ 8.72 (t, *J* = 5.4, 1H), 8.04  
46 (s, 1H), 7.96 (d, *J* = 8.9, 2H), 7.77 (d, *J* = 8.5, 2H), 7.57 (d, *J* = 8.5, 2H), 7.10 (d, *J* = 8.9, 2H), 4.05 (t, *J* = 6.5, 2H), 3.67 (t, *J* = 6.8,  
47 2H), 2.89 – 3.03 (m, 2H), 2.28 (t, *J* = 6.7, 2H), 2.15 (s, 6H), 1.72 (q, *J* = 6.8, 4H), 1.44 – 1.36 (m, 2H), 1.22 – 1.29 (m, 14H), 0.92 (t,  
48 *J* = 7.2, 3H), 0.84 (t, *J* = 6.8, 3H). **<sup>13</sup>C NMR (100 MHz, DMSO-*d*<sub>6</sub>)**: δ = 170.21, 160.94, 156.02, 143.62, 136.68, 136.10, 131.46,  
49 127.92, 125.94, 125.11, 118.25, 115.01, 105.99, 67.84, 55.54, 44.95, 44.55, 43.86, 34.92, 31.34, 29.04, 28.99, 28.77, 28.74, 28.56,  
50 25.48, 25.31, 22.14, 14.19, 14.00. **HRMS (ESI)**: *m/z* calculated for [M+ H]<sup>+</sup> C<sub>34</sub>H<sub>49</sub>N<sub>4</sub>O<sub>3</sub><sup>+</sup>, 561.37992, found 561.37854.

51

#### 52 **4. Self-assembly Experiments.**

53 The sample (EDCAz1, EDCAz2, or EDCCNA) (0.016mmol) was weighed into a pointed glass test tube and HCl aqueous solution  
54 (1 mL, 16 mmol/L) was added. The resulting mixture was further sonicated for 30 min until a clear orange solution was obtained.  
55 Subsequently, the metal ions (0.08 mmol) were added, and the mixture was further sonicated for 30 min. Finally, the solution was  
56 stood in the dark at room temperature.

57

#### 58 **5. Evaluation of LD Contribution.**

59 In order to evaluate the contribution of LD to ECD, LD, and ECD spectra have been simultaneously measured as previous reports  
60 <sup>55-58</sup>. The apparent ECD (CD<sub>app</sub>) could be expressed by the following Equation S1:

$$61 \quad CD_{app} = CD_{true} + LD \cos 2\beta_0 \sin \kappa + 1/6[CB LD LB - CD LB_2 + (1/2 \ln 10)_2 (CD_3 + CD LD_2)] \quad \mathbf{S1}$$

62 Where  $CD_{true}$  denotes the true CD signal,  $\kappa$  is the static birefringence of the modulator orientated at the angle  $\beta_0$  to the axis system  
 63 of the induced birefringence. CB and LB denote the circular and linear birefringence, respectively. The influence of the term in square  
 64 brackets on the apparent CD signal can be assumed to be small compared to the second term, since it contains higher products of the  
 65 small terms CB and CD.<sup>S5, S6</sup> For a CD spectrometer equipped with a photoelastic modulator (PEM), the factor  $\cos 2\beta_0 \sin \kappa$  is  
 66 approximately 0.02.<sup>S5, S8</sup> Therefore, the Equation (S1) can be approximatively written as Equation (S2):

$$67 \quad CD_{app} = CD_{true} + LD \times 0.02 \quad \mathbf{S2}$$

68 The true CD signals can be calculated by the following semi-empirical equation, Equation S3:

$$69 \quad CD_{true} = CD_{app} - LD \times 0.02 \quad \mathbf{S3}$$

70

## 71 **6. Job's plot**

72 The stoichiometry of the complex between EDCAz1 and  $Zn^{2+}$  was determined by Job's plot method.<sup>[S3]</sup> In this method, we kept the  
 73 total molar concentrations of EDCAz1 and  $Zn^{2+}$  constant and continuously varied the molar fraction of EDCAz1 and  $Zn^{2+}$ . The  
 74 absorbance of each mole fraction was measured at 399 nm, and the Job's curve was plotted.

75

## 76 **7. Computational Details.**

77 The structures of EDCAz1, EDCAz2, EDCCNA, EDCAz1/ $Zn^{2+}$ , EDCAz1-dimer, EDCAz1/ $Zn^{2+}$  – dimer with *P*-helix stacking,  
 78 and EDCAz1/ $Zn^{2+}$  – dimer with *M*-helix stacking were optimized at the M06-2X/LANL2DZ ~ 6–31G(d) computational level with  
 79 the IEFPCM solvation method in water. We have verified the stability of the optimized structures by using vibrational analysis (no  
 80 imaginary vibrations). ECD calculations were performed at the M06-2X/LANL2DZ ~ 6–31G (d) level of theory with TD-DFT  
 81 computing transitions to the lowest 100 electronically excited singlet states. VCD calculations were performed at the M06-  
 82 2X/LANL2DZ ~ 6–31G (d) level of theory. In the calculation process, the 6-31G (d) basis set was used for C, H, O, N, and Cl,  
 83 whereas LANL2DZ was used for Zn. All calculations were carried out using Gaussian 09 software.<sup>[S4]</sup>

84

85

86

87

88

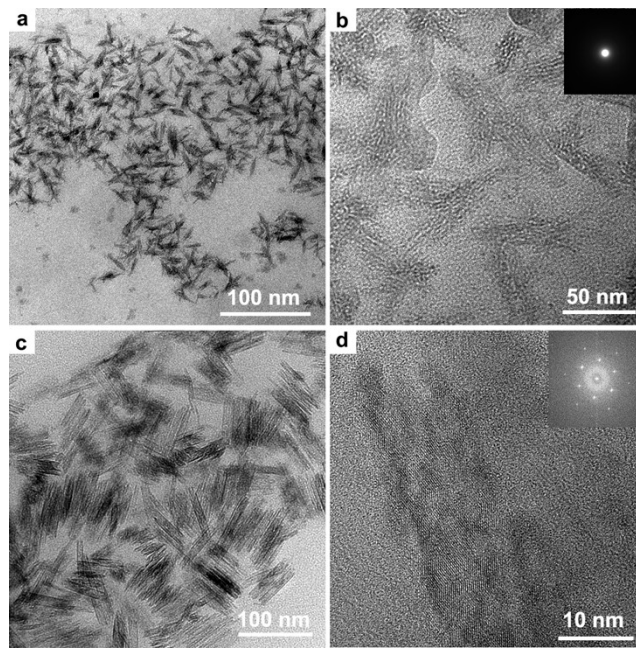

89  
90  
91  
92

**Fig. S1** TEM images of cationic EDCAz1/Fe<sup>3+</sup> system; shuttle-like nanosheets (a, b) and nanotubes (c, d); inset in (b, d) is the fast Fourier transformation (FFT) pattern.

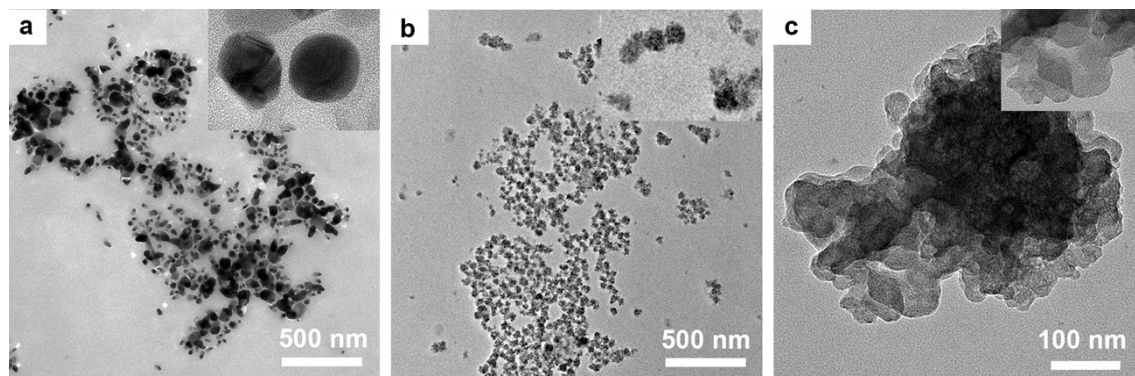

93  
94  
95  
96  
97  
98  
99  
100  
101  
102

**Fig. S2** TEM images of cationic EDCAz1/Al<sup>3+</sup> (a), cationic EDCAz1/Cu<sup>2+</sup> (b), and cationic EDCAz1/Ca<sup>2+</sup> (c).

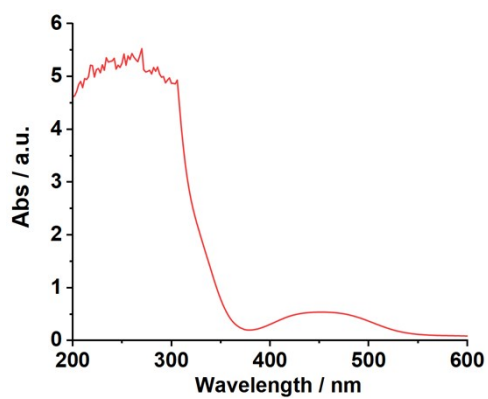

Fig. S3 Absorption spectra of PdCl<sub>2</sub> in dilute hydrochloric acid aqueous solution

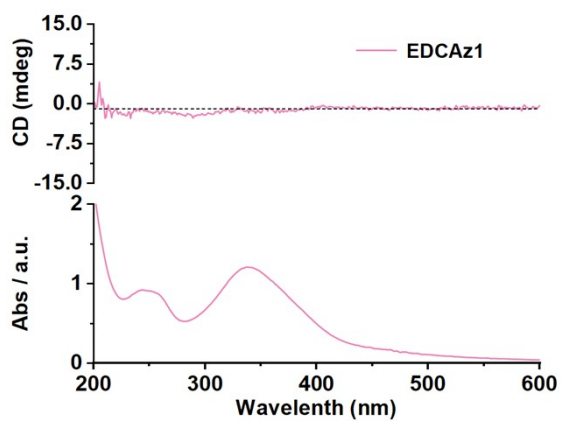

Fig. S4 CD spectra of cationic EDCAz1.

103

104

105

106

107

108

109

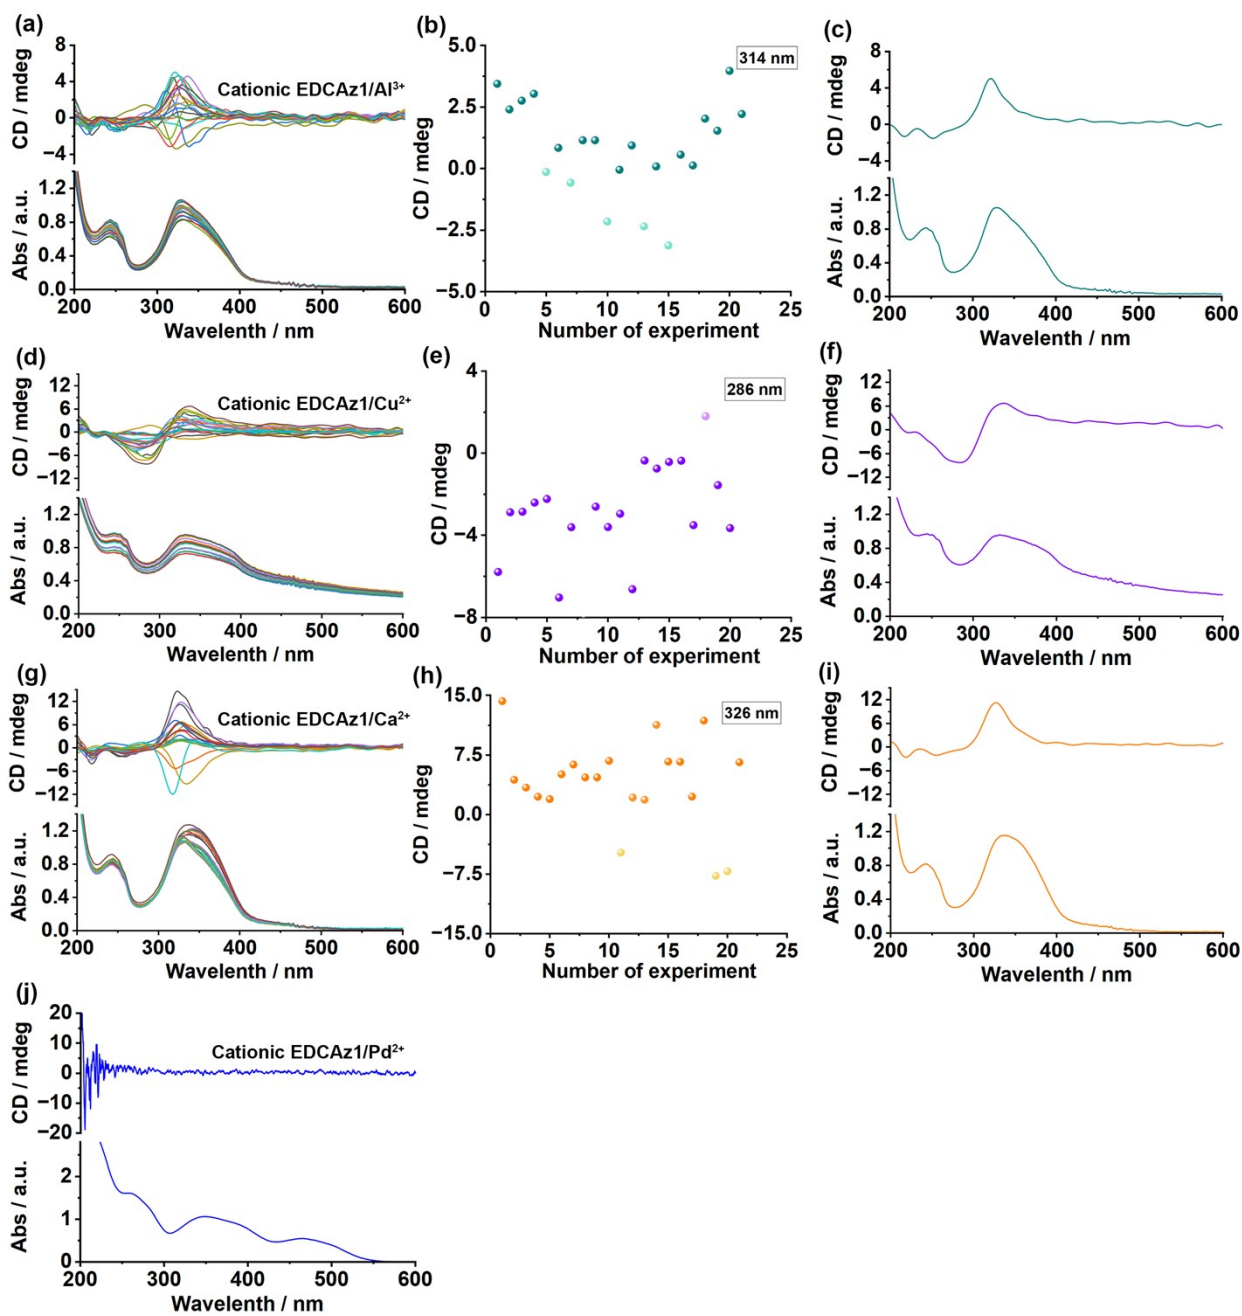

110

111 **Fig. S5** CD spectra of cationic EDCAz1/ $\text{Al}^{3+}$  (a, b, and c), cationic EDCAz1/ $\text{Cu}^{2+}$  (d, e, and f), cationic EDCAz1/ $\text{Ca}^{2+}$  (g, h, and i),  
 112 and cationic EDCAz1/ $\text{Pd}^{2+}$  (j).

113

114

115

116

117

118



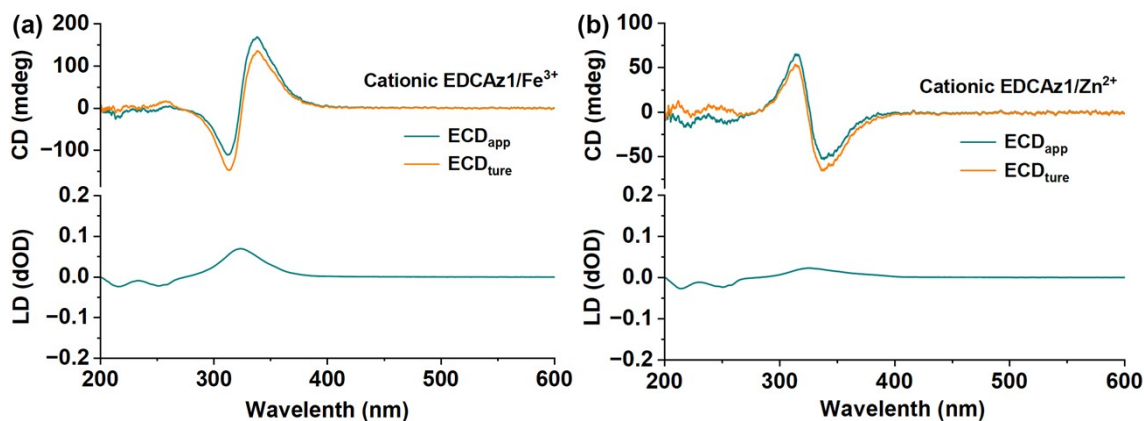

119  
120 **Fig. S6** The contribution of LD to ECD is assessed as represented by cationic EDCAz1/Fe<sup>3+</sup> and cationic EDCAz1/Zn<sup>2+</sup> systems.

121

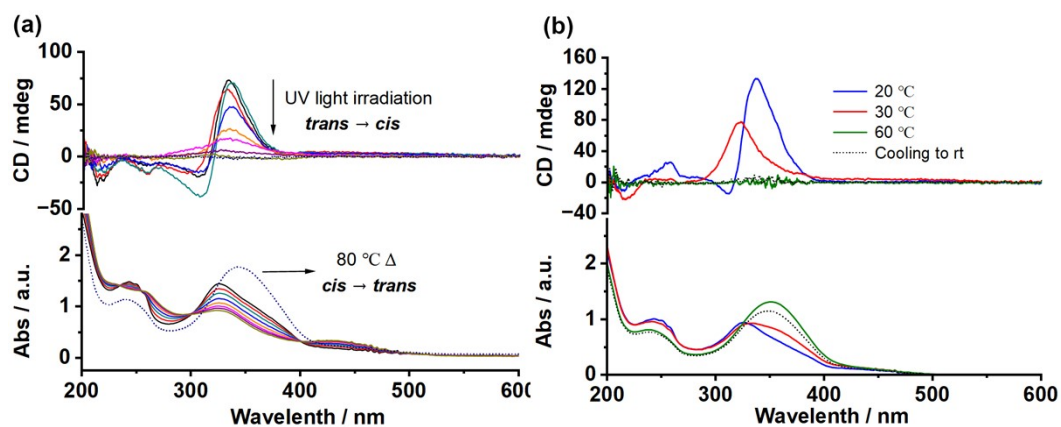

122  
123 **Fig. S7** ECD changes of representative cationic EDCAz1/Fe<sup>3+</sup> by *trans-cis-trans* isomerization (a) and heating-cooling stimuli (b).

124

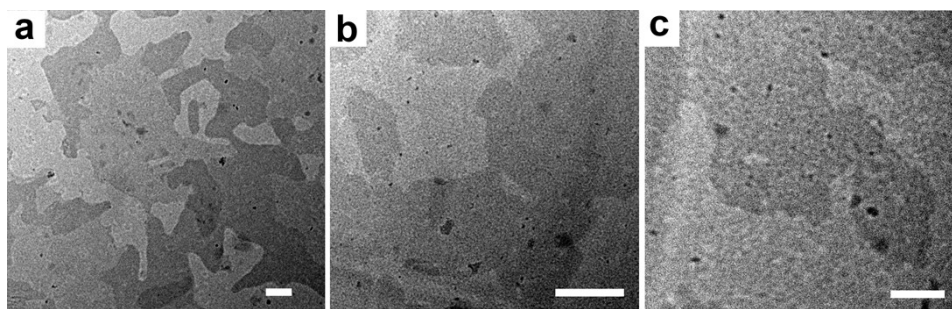

125  
126 **Fig. S8** TEM images of cationic EDCAz2 (a), cationic EDCAz2/Zn<sup>2+</sup> (b), cationic EDCAz2/Fe<sup>2+</sup> (c); Scale bars, 200 nm.

127

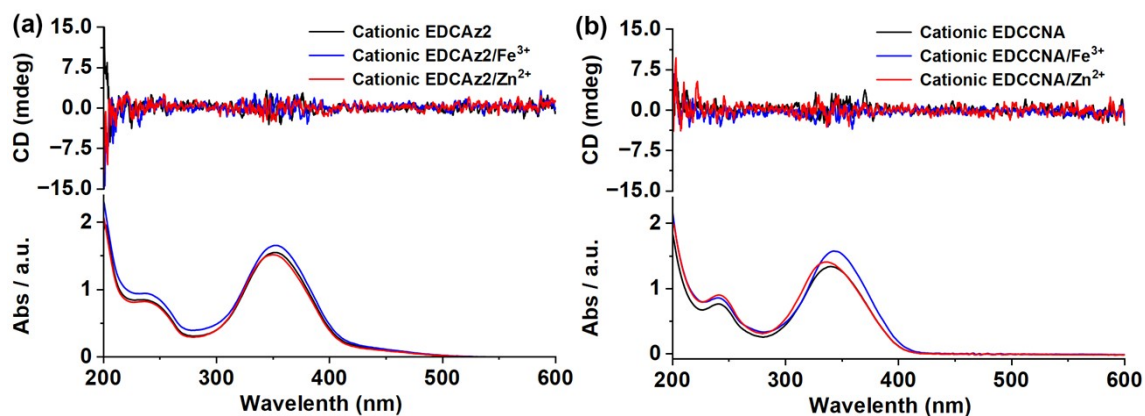

128  
 129 **Fig. S9** CD spectra of cationic EDCAz2, cationic EDCAz2/Fe<sup>2+</sup>, and cationic EDCAz2/Zn<sup>2+</sup> (a); CD spectra of cationic EDCCNA,  
 130 cationic EDCCNA/Fe<sup>2+</sup>, and cationic EDCCNA/Zn<sup>2+</sup> (a).  
 131

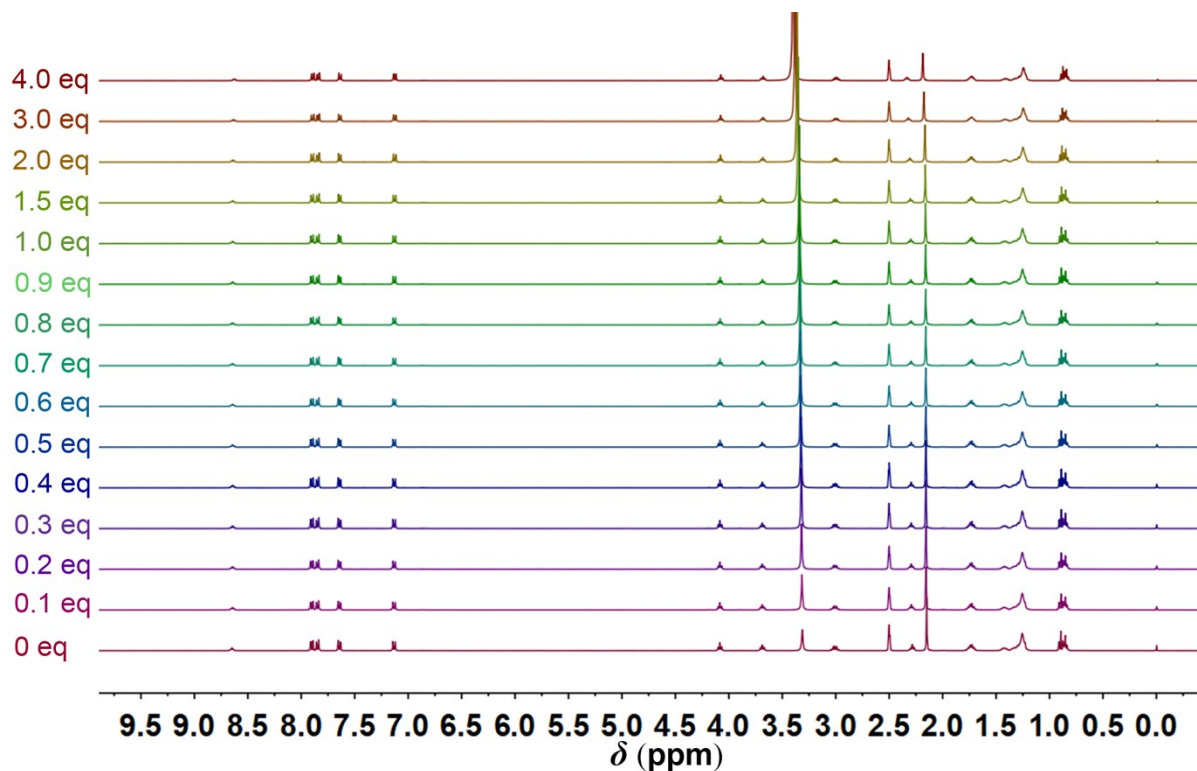

132  
 133 **Fig. S10** <sup>1</sup>H NMR spectra of EDCAz1 in DMSO-*d*<sub>6</sub> with the addition of different equiv. of Zn<sup>2+</sup>. (EDCAz1 was dissolved in  
 134 DMSO-*d*<sub>6</sub> followed by the sequential addition of Zn(NO<sub>3</sub>)<sub>2</sub>·6H<sub>2</sub>O in DMSO-*d*<sub>6</sub>.)  
 135  
 136  
 137  
 138  
 139  
 140

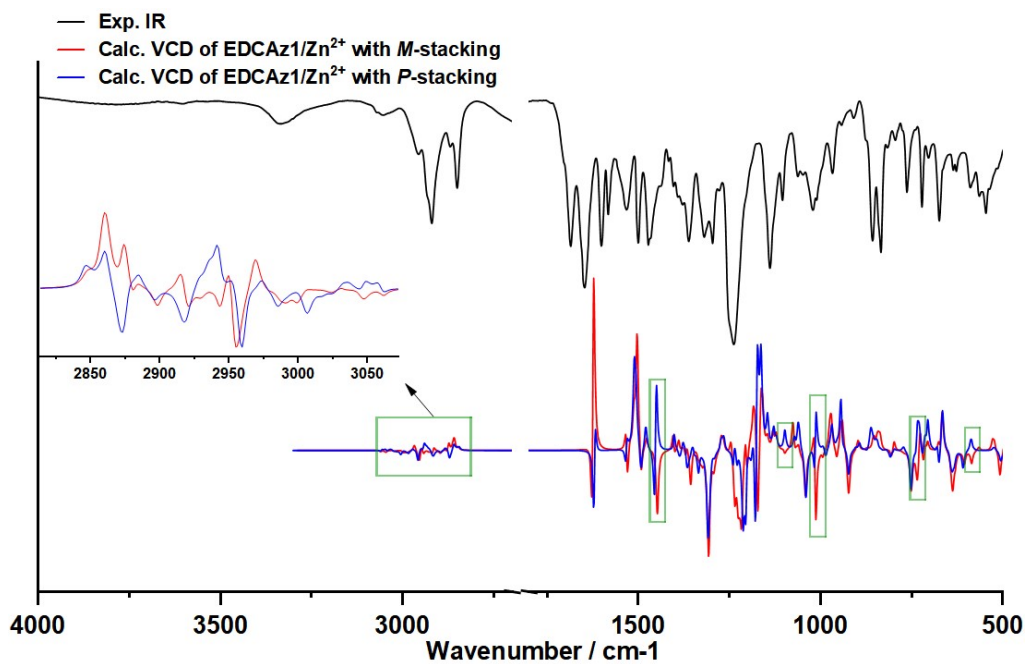

**Fig. S11** Comparison of experimental infrared absorption spectroscopy with computed vibrational circular dichroism.

141  
142  
143  
144  
145  
146  
147  
148  
149  
150  
151  
152  
153  
154  
155  
156  
157  
158  
159  
160  
161  
162  
163  
164

165 8.  $^1\text{H}$  NMR and  $^{13}\text{C}$  NMR Spectra.

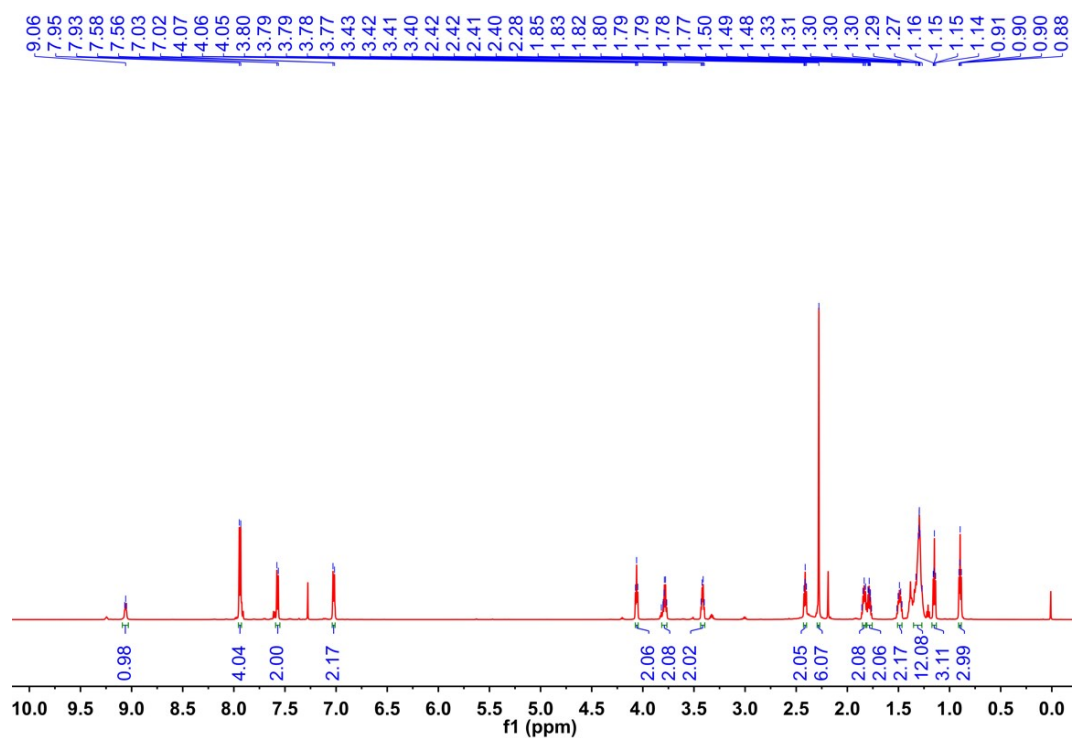

Fig. S12  $^1\text{H}$  NMR spectrum (400 MHz) of EDCAz2 in  $\text{CDCl}_3$  at 25 °C.

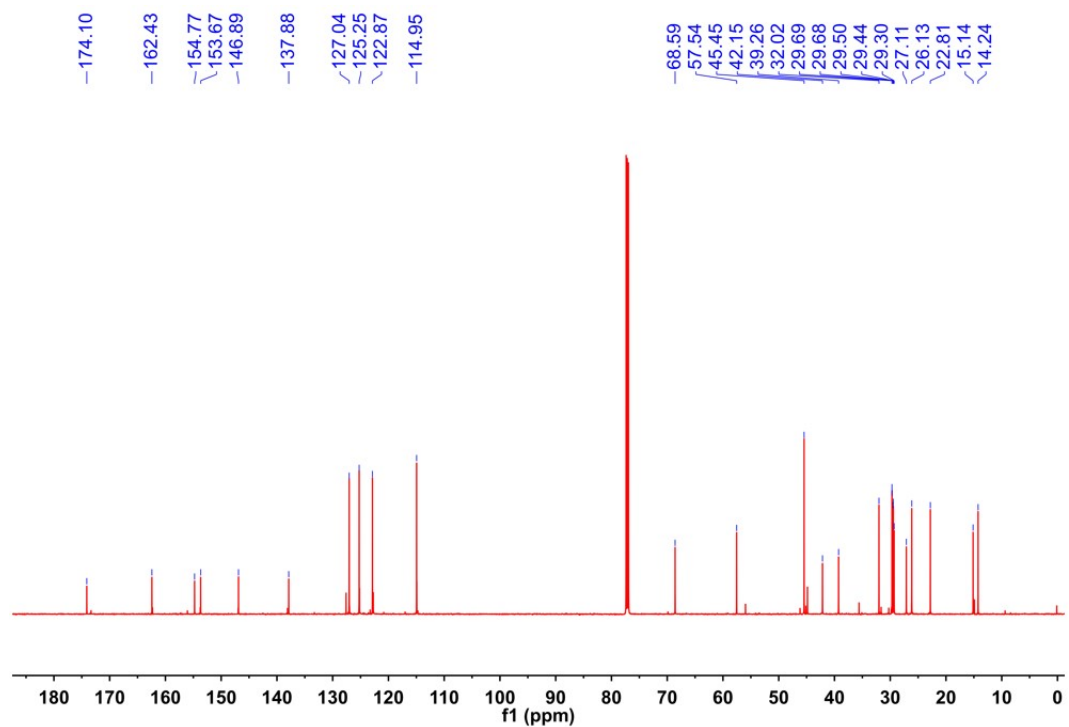

Fig. S13  $^{13}\text{C}$  NMR spectrum (100 MHz) of EDCAz2 in  $\text{CDCl}_3$  at 25 °C.

166  
167  
168

169  
170

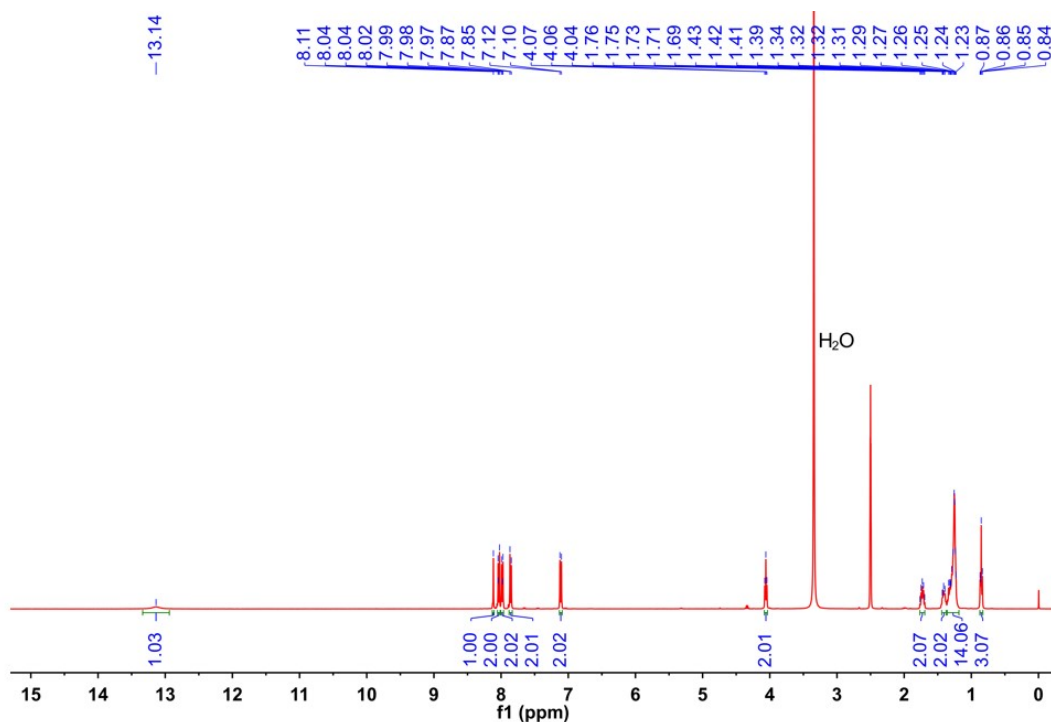

Fig. S14  $^1\text{H}$  NMR spectrum (400 MHz) of compound **5** in  $\text{DMSO-}d_6$  at 25  $^\circ\text{C}$ .

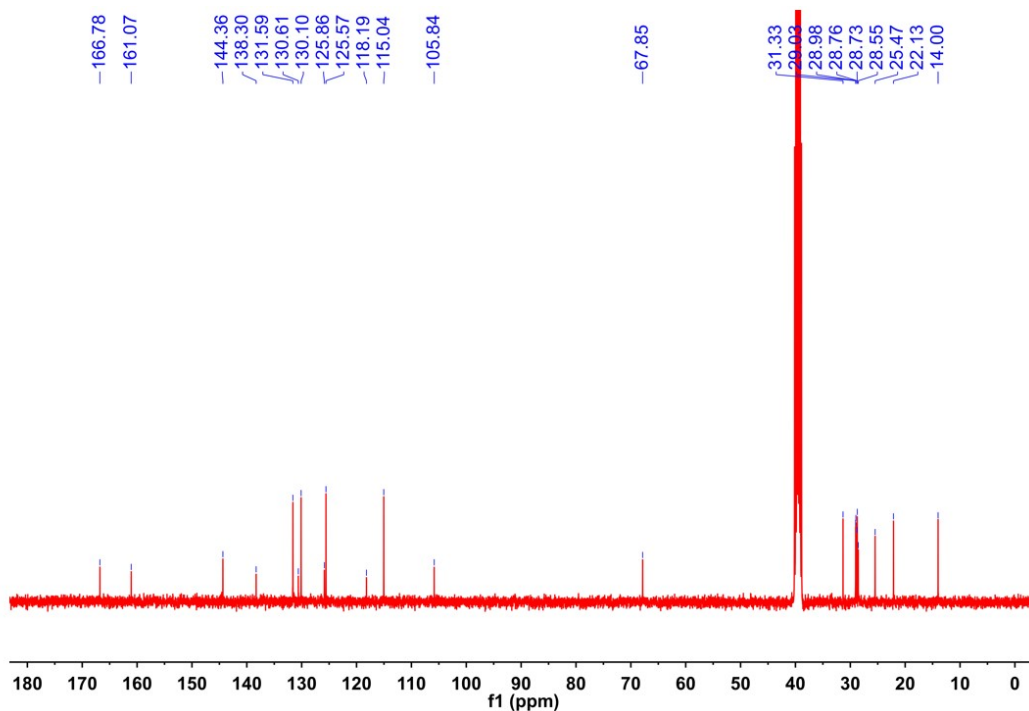

Fig. S15  $^{13}\text{C}$  NMR spectrum (100 MHz) of compound **5** in  $\text{DMSO-}d_6$  at 25  $^\circ\text{C}$ .

171

172

173

174

175

176

177

178

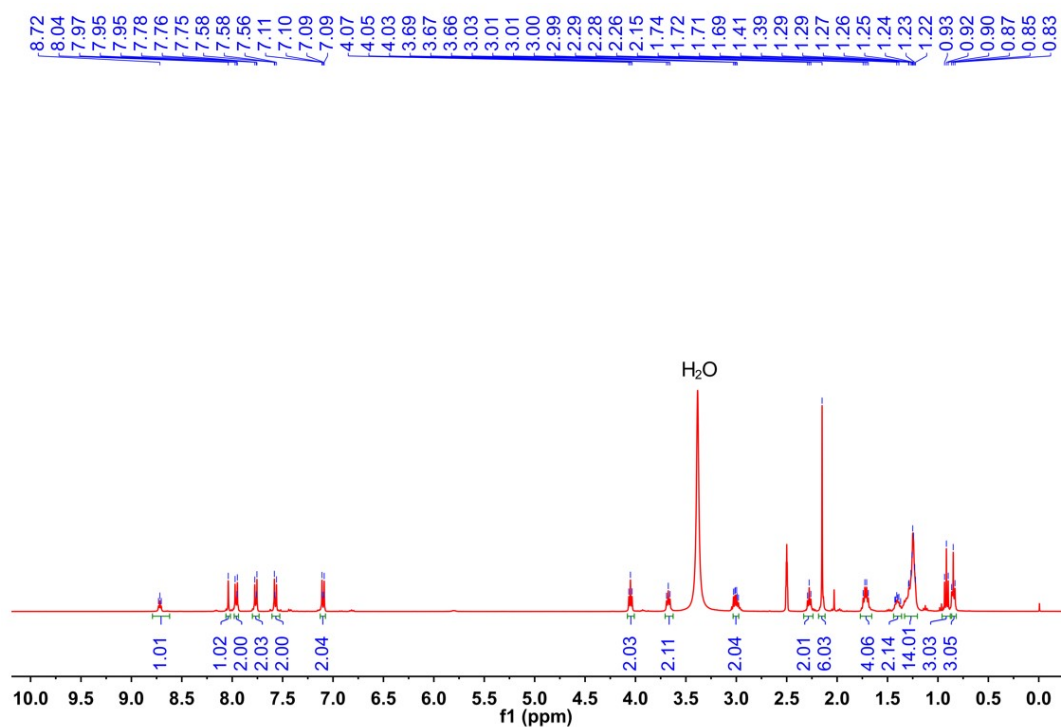

Fig. S16 <sup>1</sup>H NMR spectrum (400 MHz) of EDCCNA in DMSO-*d*<sub>6</sub> at 25 °C.

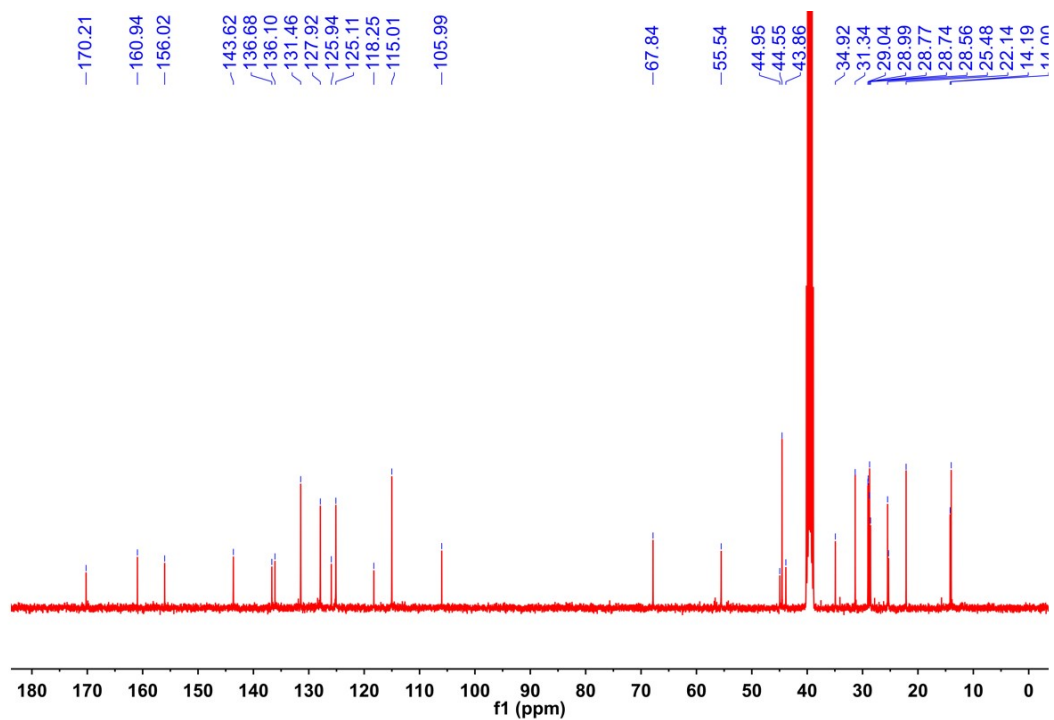

Fig. S17 <sup>13</sup>C NMR spectrum (100 MHz) of EDCCNA in DMSO-*d*<sub>6</sub> at 25 °C.

179  
180  
181

182  
183  
184  
185  
186

187 **References.**

- 188 [S1] L. Zhang, L. Zhou, N. Xu, and Z. Ouyang, *Angew. Chem. Int. Ed.* 2017, 56, 8191 - 8195.
- 189 [S2] J. Abdulkareem Abbas and Y. Yıldırım, *J. Mol. Struct.* 2023, 1281, 135050.
- 190 [S3] L. -J. Yang, Q. Chang, S. -Y. Zhou, Y. -H. Yang, F. -T. Xia, W. Chen, M. Li and X. -D. Yang. *Dyes Pigments.* 2018, 150, 193 -  
191 201.
- 192 [S4] M. J. Frisch, G. W. Trucks, H. B. Schlegel, G. E. Scuseria, M. A. Robb, J. R. Cheeseman, G. Scalmani, V. Barone, B. Mennucci,  
193 G. A. Petersson, H. Nakatsuji, M. Caricato, X. Li, H. P. Hratchian, A. F. Izmaylov, J. Bloino, G. Zheng, J. L. Sonnenberg, M. Hada,  
194 M. Ehara, K. Toyota, R. Fukuda, J. Hasegawa, M. Ishida, T. Nakajima, Y. Honda, O. Kitao, H. Nakai, T. Vreven, J. A. Montgomery,  
195 Jr., J. E. Peralta, F. Ogliaro, M. Bearpark, J. J. Heyd, E. Brothers, K. N. Kudin, V. N. Staroverov, R. Kobayashi, J. Normand, K.  
196 Raghavachari, A. Rendell, J. C. Burant, S. S. Iyengar, J. Tomasi, M. Cossi, N. Rega, J. M. Millam, M. Klene, J. E. Knox, J. B. Cross,  
197 V. Bakken, C. Adamo, J. Jaramillo, R. Gomperts, R. E. Stratmann, O. Yazyev, A. J. Austin, R. Cammi, C. Pomelli, J. W. Ochterski,  
198 R. L. Martin, K. Morokuma, V. G. Zakrzewski, G. A. Voth, P. Salvador, J. J. Dannenberg, S. Dapprich, A. D. Daniels, Ö. Farkas, J.  
199 B. Foresman, J. V. Ortiz, J. Cioslowski, and D. J. Fox, *Gaussian 09, Revision D.01*, Gaussian, Inc., Wallingford CT, 2009.
- 200 [S5] H. Gillgren, A. Stenstam, M. Ardhammar, B. Nordón, E. Sparr, S. Ulvenlund, *Langmuir* 2002, 18, 462 - 469.
- 201 [S6] A. Ohira, K. Okoshi, M. Fujiki, M. Kunitake, M. Naito, *Adv. Mater.* 2004, 16, 1645 - 1650.
- 202 [S7] G. Gottarelli, S. Lena, S. Masiero, S. Pieraccini, G. P. Spada, *Chirality* 2008, 20, 471 - 485.
- 203 [S8] Å. Davidsson, B. Nordén, S. Seth, *Chem. Phys. Lett.* 1980, 70, 313 - 316.
- 204
- 205
